# Supplementary material for: Short-term effect of simulated salt marsh restoration by sand-amendment on sediment bacterial communities
Source: PubMed Central journal article supplement (PMC6488055; doi:10.1371/journal.pone.0215767), 2019-04-29
Supplement: pone.0215767.s003.pdf [file pone.0215767.s003.pdf]

**S1 Table:** Summary of above and belowground plant biomass, chemical composition of pore water at 21 cm depth and carbon dioxide flux.

|                                                                                | <b>Natural sediment</b> |            | <b>Sand-amended</b> |            |
|--------------------------------------------------------------------------------|-------------------------|------------|---------------------|------------|
|                                                                                | <b>Bottom</b>           | <b>Top</b> | <b>Bottom</b>       | <b>Top</b> |
| <b>CO<sub>2</sub> flux (μmol CO<sub>2</sub>.m<sup>-2</sup>.s<sup>-1</sup>)</b> | 1.36                    | 3.47       | 3.07                | 3.82       |
| <b>Aboveground (g.m<sup>-2</sup>)</b>                                          |                         |            |                     |            |
| Dead                                                                           | 31.1                    | 127.3      | 50.0                | 47.3       |
| Alive                                                                          | 324.9                   | 400.0      | 269.5               | 318.7      |
| Total                                                                          | 356.0                   | 527.3      | 319.5               | 366.0      |
| <b>Belowground biomass (gdw.m<sup>-2</sup>)</b>                                | 3762.1                  | 6255.8     | 3170.7              | 3354.7     |
| <b>Carbon content (C %)</b>                                                    | 3.95                    | 3.56       | 1.53                | 2.95       |
| <b>Nitrogen content (N %)</b>                                                  | 0.30                    | 0.27       | 0.12                | 0.23       |
| <b>C/N ratio</b>                                                               | 12.95                   | 13.35      | 12.03               | 14.76      |
| <b>Salinity (ppt)</b>                                                          | 30.0                    | 29.5       | 24.0                | 20.5       |
| <b>pH</b>                                                                      | 7.40                    | 6.40       | 5.74                | 5.80       |
| <b>H<sub>2</sub>S (μM)</b>                                                     | 80.1                    | 0.0        | 20.8                | 0          |
| <b>PO<sub>4</sub> (μM)</b>                                                     | 77.5                    | 0.14       | 2.39                | 0.43       |
| <b>NH<sub>4</sub> (μM)</b>                                                     | 337.5                   | 2.4        | 5.5                 | 2.2        |

Values are mean of two independent replicate cores. Adapted from Wigand *et al.* [24]
