# Supplementary material for: Short-term effect of simulated salt marsh restoration by sand-amendment on sediment bacterial communities
Source: PubMed Central journal article supplement (PMC6488055; doi:10.1371/journal.pone.0215767), 2019-04-29
Supplement: pone.0215767.s004.pdf [file pone.0215767.s004.pdf]

**S2 Table:** Description of the samples and alpha-diversity measures.

| Sample ID | Sediment | Shelf  | Depth (cm) | DNA yield ( $\mu\text{g/g}$ ) | Reads | OTUs | Shannon |
|-----------|----------|--------|------------|-------------------------------|-------|------|---------|
| 2.2 1     | natural  | bottom | 1          | 25.2                          | 1875  | 390  | 5.63    |
| 2.2 10    | natural  | bottom | 10         | 17.5                          | 1661  | 375  | 5.59    |
| 2.2 21    | natural  | bottom | 21         | 9.0                           | 1704  | 346  | 5.36    |
| 2.5 1     | natural  | bottom | 1          | 4.8                           | 1697  | 362  | 5.52    |
| 2.5 10    | natural  | bottom | 10         | 10.5                          | 1524  | 348  | 5.43    |
| 2.5 21    | natural  | bottom | 21         | 5.0                           | 2692  | 486  | 5.54    |
| 2.3 1     | sand     | bottom | 1          | 2.4                           | 5129  | 268  | 3.63    |
| 2.3 10    | sand     | bottom | 10         | 4.0                           | 2694  | 395  | 5.32    |
| 2.3 21    | sand     | bottom | 21         | 1.3                           | 1856  | 379  | 5.58    |
| 2.6 1     | sand     | bottom | 1          | 6.6                           | 2106  | 334  | 5.10    |
| 2.6 10    | sand     | bottom | 10         | 6.1                           | 2801  | 303  | 4.53    |
| 2.6 21    | sand     | bottom | 21         | 0.6                           | 2158  | 372  | 5.29    |
| 6.2 1     | natural  | top    | 1          | 12.4                          | 1984  | 319  | 5.21    |
| 6.2 10    | natural  | top    | 10         | 4.7                           | 4249  | 368  | 4.83    |
| 6.2 21    | natural  | top    | 21         | 5.5                           | 2362  | 372  | 5.19    |
| 6.4 1     | natural  | top    | 1          | 9.6                           | 1789  | 357  | 5.18    |
| 6.4 10    | natural  | top    | 10         | 12.9                          | 1773  | 344  | 5.37    |
| 6.4 21    | natural  | top    | 21         | 6.8                           | 2047  | 407  | 5.62    |
| 6.1 1     | sand     | top    | 1          | 12.3                          | 1601  | 329  | 5.37    |
| 6.1 10    | sand     | top    | 10         | 6.0                           | 6751  | 285  | 3.63    |
| 6.1 21    | sand     | top    | 21         | 0.9                           | 4739  | 299  | 4.10    |
| 6.3 1     | sand     | top    | 1          | 4.7                           | 2497  | 378  | 5.34    |
| 6.3 10    | sand     | top    | 10         | 4.6                           | 2678  | 244  | 3.67    |
| 6.3 21    | sand     | top    | 21         | 0.8                           | 7756  | 255  | 3.46    |

The three digits of sample IDs are as follows: 1<sup>st</sup> digit: elevation (2=bottom, 6=top); second digit: unique identifier for the pot number for each elevation; third digit: sampling depth (1, 10 or 21 cm). The 1<sup>st</sup> and 2<sup>nd</sup> digit are the same as the ID provided in the supplemental table of Wigand *et al.* (24).
