# Supplementary material for: Short-term effect of simulated salt marsh restoration by sand-amendment on sediment bacterial communities
Source: PubMed Central journal article supplement (PMC6488055; doi:10.1371/journal.pone.0215767), 2019-04-29
Supplement: pone.0215767.s005.pdf [file pone.0215767.s005.pdf]

**S3 Table:** Summary of permutational analysis of variance (PERMANOVA with 999 permutations) testing the effect of sediment source, elevation and depth on the bacterial community composition.

| <b>Sample set</b>   | <b>Source</b> | <b>Df</b> | <b>SS</b> | <b>MS</b> | <b>Pseudo-F</b> | <b>R<sup>2</sup></b> | <b>P(perm)</b> |
|---------------------|---------------|-----------|-----------|-----------|-----------------|----------------------|----------------|
| <b>All</b>          | Sediment      | 1         | 0.656     | 0.656     | 1.387           | 0.059                | 0.001          |
|                     | Residuals     | 22        | 10.403    | 0.473     |                 | 0.941                |                |
|                     | Total         | 23        | 11.059    |           |                 | 1.000                |                |
| <b>Natural</b>      | Shelf         | 1         | 0.548     | 0.548     | 1.219           | 0.106                | 0.021          |
|                     | Depth         | 2         | 1.039     | 0.520     | 1.156           | 0.200                | 0.020          |
|                     | Residuals     | 8         | 3.597     | 0.450     |                 | 0.694                |                |
|                     | Total         | 11        | 5.184     |           |                 | 1.000                |                |
| <b>Sand-amended</b> | Shelf         | 1         | 0.505     | 0.505     | 1.092           | 0.097                | 0.137          |
|                     | Depth         | 2         | 0.992     | 0.496     | 1.073           | 0.191                | 0.134          |
|                     | Residuals     | 8         | 3.700     | 0.462     |                 | 0.712                |                |
|                     | Total         | 11        | 5.197     |           |                 | 1.000                |                |
